# Supplementary material for: EBNA1-specific T cells from patients with multiple sclerosis cross react with myelin antigens and co-produce IFN-γ and IL-2
Source: PubMed Central journal article supplement — J Exp Med. 2008 Aug 4;205(8):1763–73. doi: 10.1084/jem.20072397 (PMC2525578; doi:10.1084/jem.20072397), 2008-08-04
Supplement: jem.20072397_6.pdf [file jem.20072397_6.pdf]

**Table S1.** Patients and healthy donors

|                          |                                                                        | MS (n = 24) | HD (n = 24) |
|--------------------------|------------------------------------------------------------------------|-------------|-------------|
| Demographic data         | Age (median [range])                                                   | 32 (24–57)  | 32 (24–67)  |
|                          | Gender (male/female)                                                   | 1:1.86      | 1:1.5       |
| HLA-DR haplotype         | HLA-DR2/DRx                                                            | 12 (50%)    | 11 (46%)    |
|                          | HLA-DR2/DR4                                                            | 9 (38%)     | 9 (38%)     |
|                          | HLA-DRx/DR2                                                            | 3 (13%)     | 4 (17%)     |
| Clinical characteristics | Disease duration in years from first clinical symptom (median [range]) | 2.5 (1–21)  | N/A         |
|                          | EDSS (median [range])                                                  | 1.5 (0–6.5) | N/A         |

EDSS, expanded disability status score.

**Table S2.** IFN- $\gamma$  responses to rVV constructs expressing EBV-encoded antigens before and after depletion of CD8<sup>+</sup> T cells

|                                               | rVV-TK- | rVV-BZLF1 | rVV-EBNA1 | rVV-EBNA2 | rVV-EBNA3A | rVV-EBNA3B | rVV-EBNA3C | rVV-LMP1 | rVV-LMP2A | flu     |
|-----------------------------------------------|---------|-----------|-----------|-----------|------------|------------|------------|----------|-----------|---------|
| PBMC (MS/HD)                                  | 23/23   | 110/98    | 45/26     | 21/20     | 66/56      | 79/91      | 147/139    | 45/37    | 62/45     | 194/208 |
| CD8 <sup>+</sup> T cell-depleted PBMC (MS/HD) | 17/17   | 45/56     | 47/29     | 27/20     | 30/28      | 35/32      | 74/65      | 34/38    | 49/38     | 53/72   |
| x-fold reduction (MS/HD)                      | 1.4/1.4 | 2.4/1.8   | 1.0/0.9   | 0.8/1.0   | 2.2/2.0    | 2.3/2.8    | 2.0/2.1    | 1.3/1.0  | 1.3/1.2   | 3.7/2.9 |

Responses were assessed by IFN- $\gamma$ -specific ELISPOT assays and compared to an influenza A virus (A/Aichi/68; H3N2) infection. The table shows the number of IFN- $\gamma$  spots in cell preparations derived from MS patients and healthy virus carriers, as well as the relative changes in the number of IFN- $\gamma$  spots before and after CD8<sup>+</sup> T cell depletion.

Lünemann et al. | <http://www.jem.org/cgi/content/full/jem.20072397/DC1>**Table S3A.** EBNA1 peptide library (aa 400-641),  $n = 51$ 

| Sequence               | Length (aa) |
|------------------------|-------------|
| PGRRPFFHPVGEADY        | 15          |
| FFHPVGEADYFEYH         | 14          |
| VGEADYFEYHQEGG         | 14          |
| DYFEYHQEGGPDGEPDV      | 17          |
| EGGPDGEPDVPPGAI        | 15          |
| GEPDVPPGAIEQGPA        | 15          |
| PPGAIEQGPADDPGEGPSTGPR | 22          |
| EQGPADDPGEGPSTGPR      | 17          |
| PGEGPSTGPRGQGDGGR      | 17          |
| GPRGQGDGGRRK           | 13          |
| GQGDGGRKKGGWF          | 14          |
| GRRKKGGWFGKHR          | 14          |
| KKGGWFGKHRRGQGS        | 15          |
| FGKHRRGQGSNPKF         | 14          |
| RGQGSNPKFENIA          | 14          |
| GSNPKFENIAEGLRA        | 15          |
| FENIAEGLRALLAR         | 14          |
| AEGLRALLARSHVER        | 15          |
| ALLARSHVERTTDEGTW      | 17          |
| VERTTDEGTWVAGVF        | 15          |
| DEGTWVAGVIFY           | 12          |
| GTWVAGVIFYGGSK         | 14          |
| AGVIFYGGSKTSLY         | 14          |
| VYGGSKTSLYNLRR         | 14          |
| SKTSLYNLRRGTALA        | 15          |
| NLRRGTALAIQPCR         | 14          |
| GTALAIQCRLTPL          | 14          |
| AIQQCRLTPLSRLPF        | 15          |
| RLTPLSRLPFGMA          | 13          |
| PLSRLPFGMAPGPG         | 14          |
| LPFGMAPGPGPQGPL        | 16          |
| PGPGPQGPLRESIV         | 15          |
| PQGPLRESIVCYFM         | 15          |
| LRESIVCYFMVFL          | 13          |
| SIVCYFMVFLQTHIF        | 15          |
| FMVFLQTHIFAEVLK        | 15          |
| LGTHIFAEVLKDAIK        | 15          |
| FAEVLKDAIKDLVM         | 14          |
| LKDAIKDLVMTKPA         | 14          |
| IKDLVMTKPAPTCNI        | 15          |

|                  |    |
|------------------|----|
| MTKPAPTCNIRVTV   | 14 |
| APTCNIRVTVCSF    | 13 |
| CNIRVTVCSFDDGV   | 14 |
| VTVCSFDDGVDLPPW  | 15 |
| FDDGVDLPPWFPPMV  | 15 |
| DLPPWFPPMVEGAAA  | 15 |
| FPPMVVEGAAAEGDDG | 16 |
| EGAAAEGDDGDDGDE  | 15 |
| EGDDGDDGDEGGDGD  | 15 |
| DDGDEGGDGDEGEEG  | 15 |
| GGDGDEGEEGQE     | 12 |

**Table S3B.** HCMV-phosphoprotein 65 peptide library (aa 1–561),  $n = 166$

| <b>Sequence</b>  | <b>Length (aa)</b> |
|------------------|--------------------|
| MESRGRRCPemisVL  | 15                 |
| GRRCPemisVLGPI   | 14                 |
| CPemisVLGPISGHV  | 15                 |
| ISVLGPISGHVVKAV  | 15                 |
| GPISGHVVKAVFSR   | 14                 |
| SGHVVKAVFSRGDTPV | 16                 |
| KAVFSRGDTPVLPH   | 14                 |
| FSRGDTPVLPHETRL  | 15                 |
| DTPVLPHETRL      | 12                 |
| TPVLPHETRL       | 15                 |
| PHETRL           | 15                 |
| RLLQTGIHVRV      | 12                 |
| LLQTGIHVRV       | 16                 |
| IHVRV            | 14                 |
| RVSQPSL          | 14                 |
| LILVSQYTPDSTPCH  | 15                 |
| SQYTPDSTPCHR     | 12                 |
| QYTPDSTPCHRG     | 12                 |
| YTPDSTPCHRGDNQL  | 15                 |
| STPCHRGDNQLQVQH  | 15                 |
| HRGDNLQVQHTYF    | 14                 |
| DNQLQVQHTYFTGSEV | 16                 |
| VQHTYFTGSEVENV   | 14                 |
| TYFTGSEVENVSVNV  | 15                 |
| GSEVENVSVNVH     | 12                 |
| SEVENVSVNVHNPTGR | 16                 |
| VSVNVHNPTGRSI    | 14                 |
| NVHNPTGRSICPSQ   | 15                 |
| PTGRSICPSQEPM    | 14                 |
| RSICPSQEPMSIYV   | 15                 |
| CPSQEPMSIYVYAL   | 14                 |
| SQEPMSIYVYALPLK  | 15                 |
| MSIYVYALPLKMLNI  | 15                 |

|                  |    |
|------------------|----|
| VYALPLKMLNIPSI   | 14 |
| LPLKMLNIPSINVHH  | 15 |
| MLNIPSINVHHYPSA  | 15 |
| PSINVHHYPSAAERK  | 15 |
| VHHYPSAAERKHRHL  | 15 |
| PSAAERKHRHLPVA   | 14 |
| AERKHRHLPVADAVI  | 15 |
| HRHLPVADAVIHA    | 14 |
| LPVADAVIHASGK    | 14 |
| ADAVIHASGKQMW    | 14 |
| VIHASGKQMWQARL   | 15 |
| ASGKQMWQARLTV    | 13 |
| GKQMWQARLTVSGLA  | 15 |
| WQARLTVSGLAWTR   | 14 |
| RLTVSGLAWTRQQNQW | 16 |
| GLAWTRQQNQWK     | 12 |
| LAWTRQQNQWKEPDV  | 15 |
| RQQNQWKEPDVYY    | 13 |
| QIQNQWKEPDVYYT   | 12 |
| NQWKEPDVYYTSAFV  | 15 |
| EPDVYYTSAFVFPTK  | 15 |
| YYTSAFVFPTKDVAL  | 15 |
| AFVFPTKDVALRHVV  | 15 |
| PTKDVALRHVVCAH   | 15 |
| VALRHVVC AHELV   | 14 |
| RHVVC AHELVCSM   | 14 |
| VCAHELVCSMENTR   | 15 |
| HELVCSMENTRATKM  | 15 |
| CSMENTRATKMQVI   | 14 |
| ENTRATKMQVIGDQY  | 15 |
| ATKMQVIGDQYVKVY  | 15 |
| MQVIGDQYVKVYL    | 13 |
| VIGDQYVKVYLESF   | 14 |
| DQYVKVYLESFCEDEV | 15 |
| KVYLESFCEDEVPSGK | 15 |
| ESFCEDVPSGKLFMH  | 15 |
| EDVPSGKLFMHVTL   | 14 |
| PSGKLFMHVTLGSDV  | 15 |
| LFMHVTLGSDV      | 12 |
| FMHVTLGSDVEEDL   | 15 |
| TLGSDVEEDLTMTR   | 15 |
| DV EEDLTMTRNPQPF | 16 |
| TRNPQPFMRPHER    | 13 |
| NPQPFMRPHERNGF   | 14 |
| PFMRPHERNGFTVL   | 14 |
| RPHERNGFTVLCPK   | 14 |

|                   |    |
|-------------------|----|
| ERNGFTVLCPKNMII   | 15 |
| CPKNMIIKPGKISHI   | 15 |
| MIIKPGKISHIMLDV   | 15 |
| PGKISHIMLDVAF     | 13 |
| KISHIMLDVAFTSH    | 14 |
| HIMLDVAFTSHEHF    | 14 |
| LDVAFTSHEHFGLL    | 14 |
| AFTSHEHFGLLCPK    | 14 |
| SHEHFGLLCPKSI     | 14 |
| HFGLLCPKSIPGL     | 14 |
| LLCPKSIPGLSI      | 13 |
| CPKSIPGLSISGNL    | 15 |
| IPGLSISGNLLM      | 13 |
| PGLSISGNLLMNGQQI  | 16 |
| SGNLLMNGQQIFLEV   | 15 |
| LMNGQQIFLEVQAIR   | 15 |
| GQQIFLEVQAI RETV  | 15 |
| FLEVQAI RETVELR   | 14 |
| VQAI RETVELRQY    | 13 |
| AI RETVELRQYDPVA  | 15 |
| TVELRQYDPVAALFF   | 15 |
| RQYDPVAALFFFDI    | 14 |
| DPVAALFFFDIDLLL   | 15 |
| ALFFFDIDLLLQR     | 13 |
| FFFDIDLLLQRGPQY   | 15 |
| IDLLLQRGPQYSEH    | 14 |
| LLQRGPQYSEHPTF    | 14 |
| RGPQYSEHPTFT      | 13 |
| PQYSEHPTFTSQYR    | 15 |
| EHPTFTSQYRIQ GK   | 15 |
| FTSQYRIQ GKLEYR   | 15 |
| SQYRIQ GKLEYRHTW  | 15 |
| IQ GKLEYRHTWDRH   | 13 |
| KLEYRHTWDRHDEGA   | 15 |
| RHTWDRHDEGAA      | 12 |
| HTWDRHDEGAAQGDDDV | 17 |
| DEGAAQGDDDVW      | 12 |
| EGAAQGDDDVWTSGS   | 15 |
| AQGDDDVWTSGSDSD   | 15 |
| DDVWTSGSDSDEELV   | 15 |
| TSGSDSDEELVTTER   | 15 |
| DSDEELVTTERKTPR   | 15 |
| ELVTTERKTPRV      | 12 |
| LVTTERKTPRV TGGGA | 16 |
| RKTPRV TGGGAMAGA  | 15 |
| RVTGGGAMAGAS      | 13 |

|                  |    |
|------------------|----|
| TGGGAMAGASTSA    | 14 |
| GAMAGASTSAGRKR   | 15 |
| GASTSAGRKRKSA    | 14 |
| TSAGRKRKSASSA    | 14 |
| AGRKRKSASSATA    | 13 |
| RKRKSASSATACTSGV | 16 |
| ASSATACTSGVMTR   | 14 |
| ATACTSGVMTRGRLK  | 15 |
| TSGVMTRGRLKA     | 12 |
| SGVMTRGRLKAESTV  | 15 |
| TRGRLKAESTVA     | 12 |
| RGRLKAESTVAPEED  | 15 |
| KAESTVAPEEDTDED  | 15 |
| TVAPEEDTDESDNEI  | 16 |
| EDTDESDNEIHNP    | 15 |
| EDSDNEIHNPVFTW   | 15 |
| NEIHNPVFTWPPW    | 14 |
| HNPAVFTWPPWQAGI  | 15 |
| VFTWPPWQAGILAR   | 14 |
| WPPWQAGILARNLV   | 14 |
| WQAGILARNLVPMVA  | 15 |
| ILARNLVPMVATV    | 13 |
| ARNLVPMVATVQGQNL | 16 |
| PMVATVQGQNLKY    | 14 |
| ATVQGQNLKYQEFF   | 15 |
| GQNLKYQEFFWDA    | 14 |
| LKYQEFFWDANDIY   | 15 |
| QEFFWDANDIYRIF   | 15 |
| FWDANDIYRIFAE    | 14 |
| ANDIYRIFAELEGVW  | 15 |
| YRIFAELEGVWQPAA  | 15 |
| AELEGVWQPAAQPKR  | 15 |
| GVWQPAAQPKRRRHR  | 15 |
| PAAQPKRRRHRQDAL  | 15 |
| PKRRRHRQDALPGPCI | 16 |
| HRQDALPGPCIA     | 12 |
| RQDALPGPCIASTPK  | 15 |
| LPGPCIASTPKKHRG  | 15 |

**Table S3C.** Proinsulin precursor protein peptide library (aa 1–110),  $n = 30$

| Sequence        | Length (aa) |
|-----------------|-------------|
| MALWMRLLPLLALLA | 15          |
| MRLPLLALLALW    | 13          |
| LLPLLALLALWGPDP | 16          |
| ALLALWGPDPAAAFV | 15          |
| LWGPDPAAAFVNQHL | 15          |
| DPAAAFVNQHLCGSH | 15          |

|                   |    |
|-------------------|----|
| AFVNQHLCGSHLVEA   | 15 |
| NQHLCGSHLVEALYL   | 15 |
| CGSHLVEALYLV      | 12 |
| GSHLVEALYLVCGER   | 15 |
| VEALYLVCGERGFFY   | 15 |
| YLVCGERGFFYTPK    | 15 |
| GERGFFYTPKTRR     | 14 |
| GFFYTPKTRREA      | 13 |
| FYTPKTRREAEDL     | 14 |
| TPKTRREAEDLQV     | 13 |
| KTRREAEDLQVGQV    | 14 |
| REAEDLQVGQVEL     | 13 |
| AEDLQVGQVELGGGPGA | 17 |
| GQVELGGGPGAGSL    | 14 |
| ELGGGPGAGSLQPLA   | 15 |
| GPGAGSLQPLAL      | 12 |
| PGAGSLQPLALEGSL   | 15 |
| SLQPLALEGSLQKR    | 14 |
| PLALEGSLQKRGIV    | 14 |
| LEGSLQKRGIVEQCC   | 15 |
| LQKRGIVEQCCTSI    | 14 |
| RGIVEQCCTSICSLY   | 15 |
| EQCCTSICSLYQL     | 13 |
| CCTSICSLYQLENYCN  | 16 |

**Table S3D.** Myelin peptides,  $n = 15$ 

| Protein | Location               | Sequence                         | aa |
|---------|------------------------|----------------------------------|----|
| MBP     | MBP <sub>13-32</sub>   | KYLATASTMDHARHGFLPRH             | 20 |
|         | MBP <sub>83-99</sub>   | ENPVVHFFKNIVTPRTP                | 17 |
|         | MBP <sub>111-129</sub> | LSRFSWGAEGQRPGFGYGG              | 19 |
|         | MBP <sub>131-155</sub> | ASDYKSAHKGLKGVDAQGTLISKIFK       | 25 |
|         | MBP <sub>146-170</sub> | AQGTLISKIFKLGGRDSRSGSPMARR       | 25 |
|         | PLP <sub>40-60</sub>   | TGTEKLIETYFSKNYQDYEYL            | 21 |
| PLP     | PLP <sub>89-106</sub>  | GFYTTGAVRQIFGDYKTT               | 18 |
|         | PLP <sub>139-154</sub> | HCLGKWLGHDPKDFVGI                | 16 |
|         | PLP <sub>178-197</sub> | NTWTTCQSIAFPSKTSASIG             | 20 |
|         | PLP <sub>190-208</sub> | SKTSASIGSLCADARMYGVLV            | 20 |
| MOG     | MOG <sub>1-20</sub>    | GQFRVIGPRHPIRALVGDEV             | 20 |
|         | MOG <sub>11-30</sub>   | PIRALVGDEVELPCRISPGK             | 20 |
|         | MOG <sub>35-55</sub>   | MEVGWYRPPFSRVVHLYRNGK            | 21 |
| CNP     | CNP <sub>343-373</sub> | EVGELSRGKLYSLGNGRWMLTLAKNMEVRAI  | 31 |
|         | CNP <sub>356-388</sub> | GNGRWMLTLAKNMEVRAIFTGYYGKGPVPTQG | 33 |
